# Supplementary material
Source: HighWire-hosted journal article supplement (https://bmjopen.bmj.com/content/15/3/e093232)
Supplement: inline-supplementary-material-1 [file inline-supplementary-material-1.pdf]

**Good Reporting of A Mixed Methods Study (GRAMMS)**

| Guideline                                                                                   | Section: page                                         |
|---------------------------------------------------------------------------------------------|-------------------------------------------------------|
| Describe the justification for using a mixed methods approach to the research question      | Background: p 6,7                                     |
| Describe the design in terms of the purpose, priority and sequence of methods               | Design: p 8<br>Figure 1                               |
| Describe each method in terms of sampling, data collection and analysis                     | Quali. component: p 8,9<br>Quanti. component: p 14-17 |
| Describe where integration has occurred, how it has occurred and who has participated in it | Design: p 10                                          |
| Describe any limitation of one method associated with the present of the other method       | Background: p 6                                       |
| Describe any insights gained from mixing or integrating methods                             | Discussion: p 19,20                                   |
