# Supplementary material
Source: HighWire-hosted journal article supplement (https://bmjopen.bmj.com/content/15/3/e093232)
Supplement: inline-supplementary-material-2 [file inline-supplementary-material-2.pdf]

CONSORT-EHEALTH (Consolidated Standards of Reporting Trials of Electronic and Mobile HEalth Applications and onLine TeleHealth), as an extension of the CONSORT statement Number 5 for patients' gamification

| 5) The interventions for each group with sufficient details to allow replication, including how and when they were actually administered |                                                                                                                                                           |                          |
|------------------------------------------------------------------------------------------------------------------------------------------|-----------------------------------------------------------------------------------------------------------------------------------------------------------|--------------------------|
| Item no.                                                                                                                                 | Item description                                                                                                                                          | Addressed on page number |
| 5-i                                                                                                                                      | Mention names, credential, affiliations of the developers, sponsors, and owners                                                                           | P 11                     |
| 5-ii                                                                                                                                     | Describe the history/development process                                                                                                                  | P 11,12                  |
| 5-iii                                                                                                                                    | Revisions and updating                                                                                                                                    | P 12                     |
| 5-iv                                                                                                                                     | Quality assurance methods                                                                                                                                 | P 12                     |
| 5-v                                                                                                                                      | Ensure replicability by publishing the source code, and/or providing screenshots/screen-capture video, and/or providing flowcharts of the algorithms used | P 11                     |
| 5-vi                                                                                                                                     | Digital preservation                                                                                                                                      | P 11                     |
| 5-vii                                                                                                                                    | Access                                                                                                                                                    | P 11                     |
| 5-viii                                                                                                                                   | Mode of delivery, features/functionalities/components of the intervention and comparator, and the theoretical framework                                   | P 11,12                  |
| 5-ix                                                                                                                                     | Describe use parameters                                                                                                                                   | P 12                     |
| 5-x                                                                                                                                      | Clarify the level of human involvement                                                                                                                    | P 11,12                  |
| 5-xi                                                                                                                                     | Report any prompts/reminders used                                                                                                                         | P 12                     |
| 5-xii                                                                                                                                    | Describe any co-interventions (incl. training/support)                                                                                                    | P 12                     |
